# Supplementary material for: Vitamin C Maintenance against Cell Growth Arrest and Reactive Oxygen Species Accumulation in the Presence of Redox Molecular Chaperone hslO Gene
Source: MDPI journal article supplement (doi:10.3390/ijms232112786), 2022-10-24
Supplement: s1 [file s1]

## Supplementary Materials

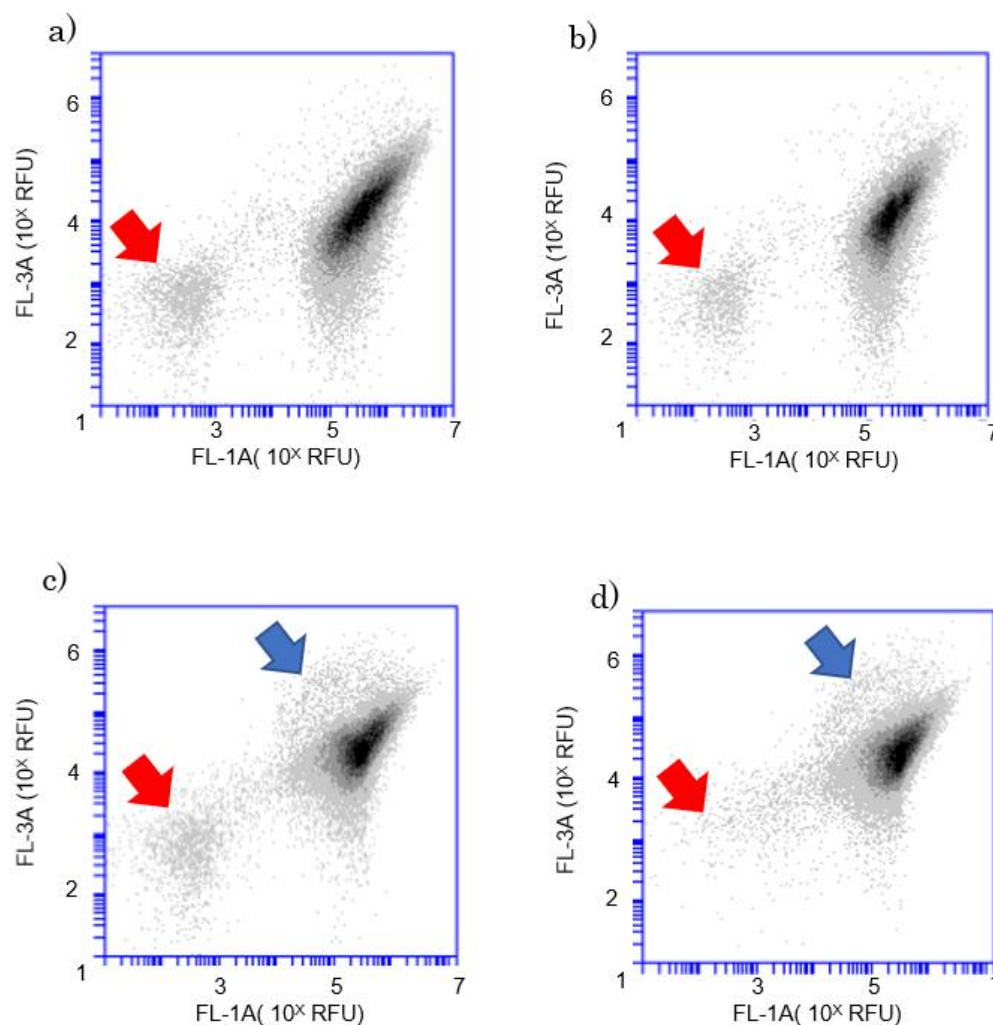

**Figure S1.** *recAts polA* and *recAts polA ΔhslO* cells analyzed with live-dead staining at the restricted and permissive temperatures. (a) *recAts polA* cells analyzed with live-dead staining at the permissive temperature. TK3077 (*recAts polA*) cells cultivated at 30 °C, stained with live-dead staining. The x-axis represents the FL-1-A: SYTO9-stained DNA contents of the cell, and the y-axis represents the FL-4A: PI-stained DNA contents of the cell. The red arrows indicate the position of cell populations which possessed very low DNA contents. The results of 10,000 particles are shown. (b) *recAts polA ΔhslO* cells analyzed with live-dead staining at the permissive temperature. TK3276 (*recAts polA ΔhslO*) cells cultivated at 30 °C and stained as indicated in (a). (c) *recAts polA* cells analyzed with live-dead staining at restricted temperature. TK3077(*recAts polA*) cells cultivated at 42 °C and stained as indicated in (a). The blue arrows indicate the positions of membrane-damage dead-cell populations. (d) *recAts polA ΔhslO* cells analyzed with live-dead staining at the restricted temperature. The TK3276 (*recAts polA ΔhslO*) cells were cultivated at 42 °C and were stained as indicated in (c).

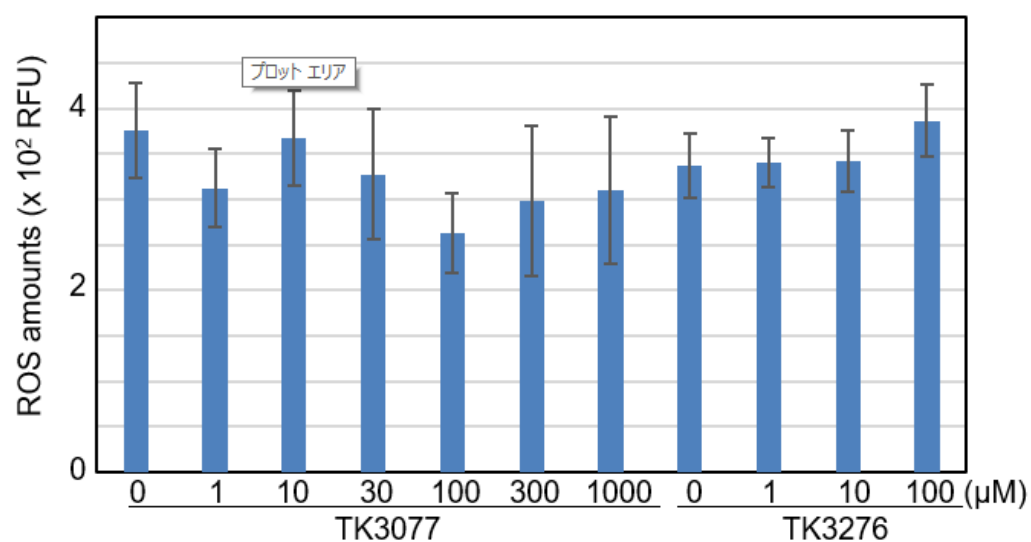

**Figure S2.** Effect of vitamin C on mean reactive oxygen species (ROS) levels of *recA*ts *polA* cells and *recA*ts *polA*  $\Delta$ *hslO* at restricted conditions. In the early logarithmic growth phase ( $O.D_{600} = 0.1$ ), the TK3077 (*recA*ts *polA*) and TK3276 (*recA*ts *polA*  $\Delta$ *hslO*) cultures were divided into four portions, and each was incubated at 42 °C either with or without the indicated vitamin C concentration on the horizontal axis. Each bar represents the average and standard error of mean: SEM ( $n \geq 3$ ).

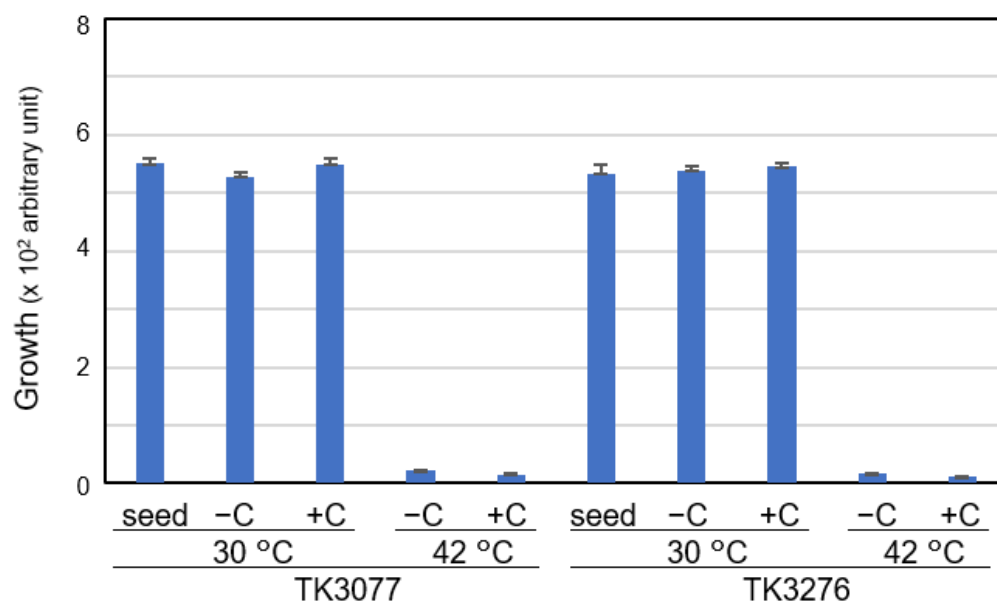

**Figure S3.** Effect of vitamin C on the growth of *recAts polA* cells and *recAts polA ΔhslO* at permissive and restricted conditions with the inoculation experiments. TK3077 (*recAts polA*) and TK3276 (*recAts polA ΔhslO*) cells were inoculated with 1/100 of the overnight seed culture and incubated either with or without 100 μM vitamin C at 30 °C or 42 °C for 16 h. Growth of cells determined as measures in turbidity (O.D.<sub>600</sub> arbitrary unit) after the culture medium was divided. The growth of the seed and cultured cells at 30 °C or 42 °C for 16 h were compared. In the figure, a combination of the bars is represented from left to right: seed culture, cell culture without vitamin C (–C), or with 100 μM vitamin C (+C) at both 30 °C and 42 °C for TK3077 and TK3276 cells. Each bar represents the average and standard error of mean: SEM (n ≥ 7).

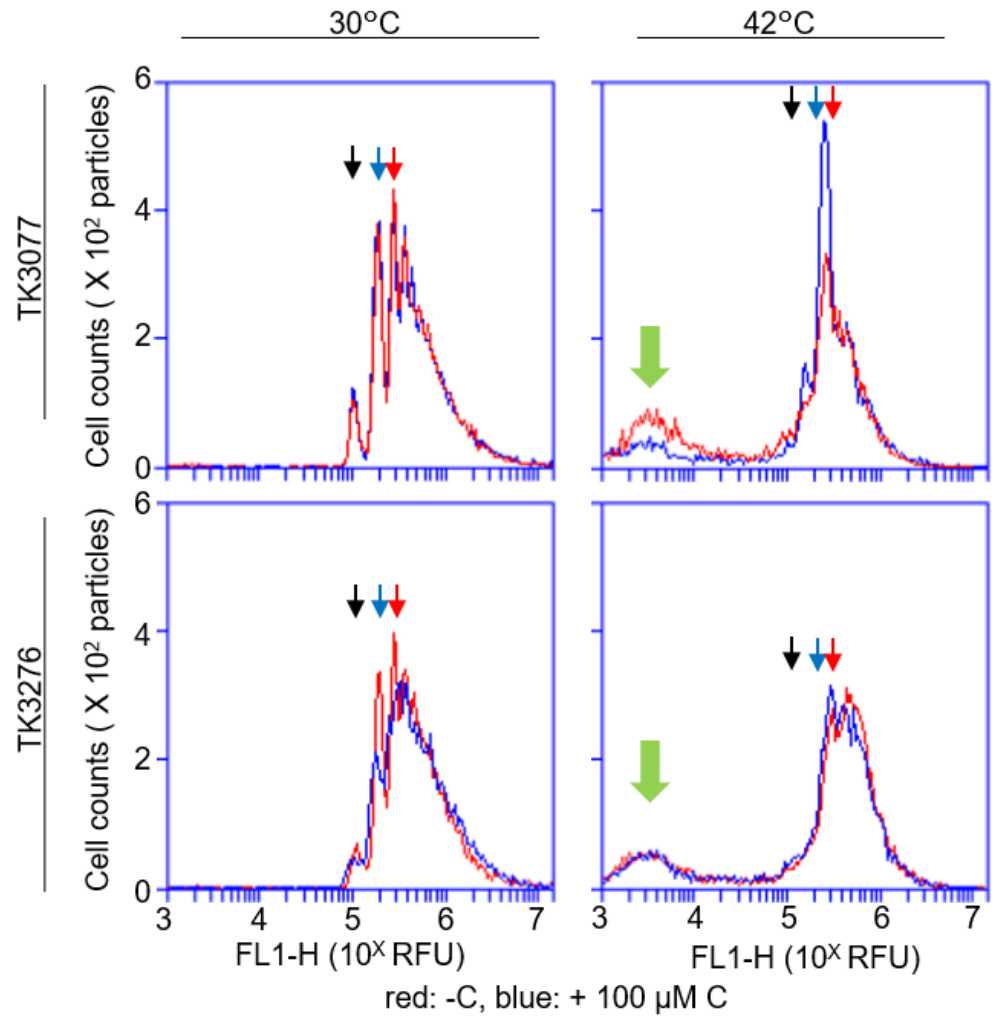

**Figure S4.** Chromosome content comparison in restrictive and permissive conditions for the *recAts polA* and *recAts polA ΔhslO* cells. The DNA of TK3077 (*recAts polA*) and TK3276 (*recAts polA ΔhslO*) cells was quantitatively compared between permissive and restrictive temperatures with or without 100  $\mu$ M vitamin C. Either TK3077 (upper) or TK3276 (lower), either 30  $^{\circ}$ C (left) or 42  $^{\circ}$ C (right), and either without vitamin C (red) or with 100  $\mu$ M vitamin C (blue) are shown. A total of 20,000 particles are shown. Arrowheads indicate ploidies as 1 (black), 2 (red), and 3 (blue). Thick green arrowheads indicate a position of anucleate cells.

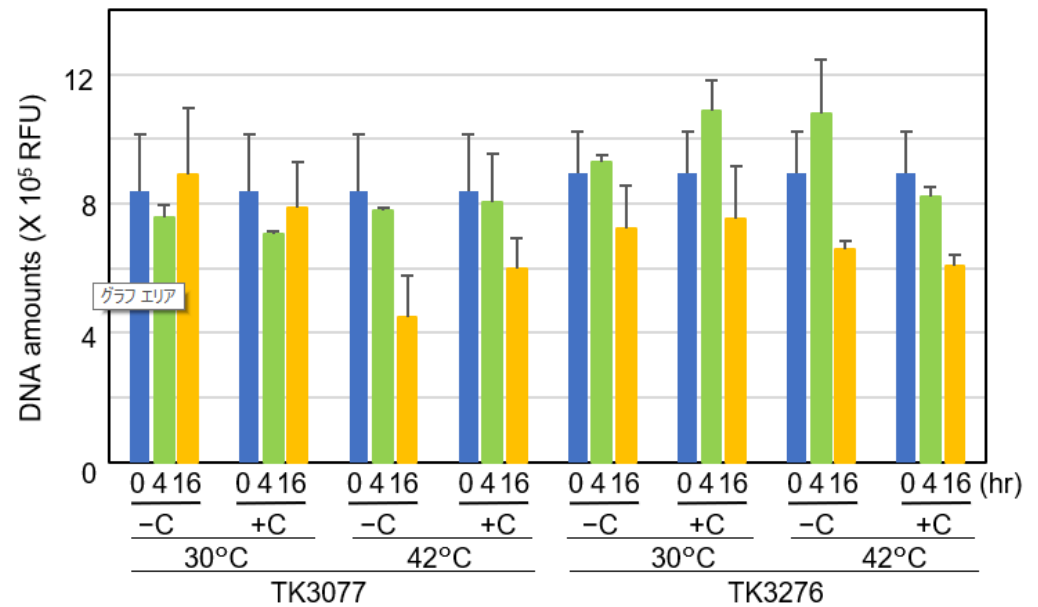

**Figure S5.** Effects of vitamin C on the DNA quantity in *recA*ts *polA* cells and *recA*ts *polA*  $\Delta$ *hslO* cells. In the early logarithmic growth phase (O.D.<sub>600</sub> = 0.1), the TK3077 (*recA*ts *polA*) and TK3276 (*recA*ts *polA*  $\Delta$ *hslO*) cultures were divided into four portions, and each was incubated either with or without vitamin C at 30 °C and 42 °C, at start time 0. The DNA quantities in both TK3077 and TK3276 cells were quantitatively measured using PicoGreen. The DNA quantity was determined using the mean FL-1A with the P3 gate. The chronologically arranged samples are shown as time 0 (blue), 4 h (green), and 16 h (yellow). Strains, temperature, and vitamin C are demonstrated below the graph. Each determination is presented as the average and standard error of the mean (n ≥ 3, SEM).

Table S1. *Escherichia coli* strains used in this study

| Strain  | Relevant Genotype                       | Source, Reference, or Construct   |
|---------|-----------------------------------------|-----------------------------------|
| AQ634   |                                         | This laboratory                   |
| AQ1025  | <i>lexA51 malB::Tn9</i>                 | This laboratory                   |
| AQ6730  | KL268 <i>recA200</i>                    | This laboratory                   |
| AQ8534  | <i>polA25::spc zih-35::Tn10</i>         | This laboratory [37]              |
| AQ10459 | As AQ10458                              | duplicated stock for AQ10458 [3]  |
| AQ10546 | AQ10458 <i>recA200</i>                  | This laboratory [2]               |
| AQ10549 | AQ10546 <i>polA25 malF::Tn10</i>        | This laboratory [2]               |
| AQ10865 | <i>lexA51 malB::Tn9</i>                 | This laboratory                   |
| AQ11369 | $\Delta hslO::Km$                       | This laboratory [2]               |
| TK3019  | AQ634 <i>malB::Tn9 lexA<sup>+</sup></i> | AQ634 × P1.AQ1025 $Cm^r$ , Tr     |
| TK3077  | As AQ10549                              | AQ10549 regrow                    |
| TK3276  | AQ10549 $\Delta hslO::Km$               | AQ10549 × P1.AQ11369 $Km^r$ , PCR |
| TK3473  | TK3276 <i>pEXvec</i>                    | TK1219 × <i>pEXvec</i> → $Ap^r$   |
| TK3474  | TK3276 <i>pEXhslO</i>                   | TK1217 × <i>pEXhslO</i> → $Ap^r$  |

Tr, temperature-resistant growth at 42 °C; Ts, temperature-sensitive growth at 42 °C;  $Tc^r$ ,  $Km^r$ ,  $Cm^r$ , and  $Ap^r$  denote resistance to tetracycline, kanamycin, chloramphenicol, and ampicillin, respectively;  $Tc^s$ ,  $Km^s$ , and  $Cm^s$  denote susceptibility to tetracycline, kanamycin, and chloramphenicol, respectively;  $UV^s$ , sensitive to UV;  $UV^r$ , resistant to UV.

AQ634: genotype: *trpA9605 his-29 proB(or proC) ilv metB1 thyA deoB(or deoC)*

AQ10458 genotype: *F- argE3 leuB-6 proA2 thr-1 thi-1 rpsL31 galK2 lacY1 mtl-1 supE44 sfiA11*
